# Supplementary material for: Bacterial components are the major contributors to the macrophage stimulating activity exhibited by extracts of common edible mushrooms
Source: Royal Society of Chemistry journal article supplement (doi:10.1039/c6fo00562d), 2016-01-01
Supplement: c6fo00562d1.pdf [file c6fo00562d1.pdf]

**Supporting information:**

Table 1S. Bacterial community composition at the phylum level for samples from 9 different types of mushroom (n=17) as determined from pyrosequencing of 16S rRNA genes.

| taxon                       | Percent of total sequences recovered | Range across samples (%) | Number of positive samples |
|-----------------------------|--------------------------------------|--------------------------|----------------------------|
| Proteobacteria              | 83.90                                | 11.73-99.89              | 17                         |
| Gammaproteobacteria         | 76.39                                | 8.34-99.39               | 17                         |
| Betaproteobacteria          | 5.70                                 | 0.3-46.30                | 17                         |
| Alphaproteobacteria         | 1.52                                 | 0-12.68                  | 14                         |
| unclassified Proteobacteria | 0.276                                | 0-2.37                   | 10                         |
| Deltaproteobacteria         | 0.013                                | 0-0.391                  | 3                          |
| Bacteroidetes               | 13.26                                | 0-72.06                  | 16                         |
| Firmicutes                  | 2.19                                 | 0-58.28                  | 9                          |
| Actinobacteria              | 0.442                                | 0-3.39                   | 12                         |
| Acidobacteria               | 0.05                                 | 0-0.958                  | 3                          |
| Chlamydiae                  | 0.008                                | 0-0.113                  | 2                          |
| Deinococcus-Thermus         | 0.005                                | 0-0.160                  | 1                          |
| unclassified bacteria       | 0.153                                | 0-0.782                  | 13                         |

Table 2S. The most abundant bacterial genera identified in samples from 9 different types of mushroom (n=17) as determined by pyrosequencing of 16S rRNA genes. Only genera that accounted for over 1% of the sequences recovered from at least one sample are shown.

| Taxon                                 | Percent of total sequences | Range across samples (%) | Number positive samples |
|---------------------------------------|----------------------------|--------------------------|-------------------------|
| <i>Pseudomonas</i>                    | 66.97                      | 1.90-99.26               | 17                      |
| <i>Flavobacterium</i>                 | 7.40                       | 0-56.20                  | 12                      |
| unclassified Enteric Bacteria cluster | 4.88                       | 0-72.48                  | 10                      |
| unclassified Oxalobacteraceae         | 2.54                       | 0-40.84                  | 12                      |
| <i>Pedobacter</i>                     | 2.43                       | 0-24.66                  | 15                      |
| <i>Serratia</i>                       | 2.14                       | 0-41.75                  | 8                       |
| <i>Mucilaginibacter</i>               | 1.61                       | 0-28.23                  | 7                       |
| unclassified Gammaproteobacteria      | 1.43                       | 0.02-9.43                | 17                      |
| <i>Duganella</i>                      | 1.30                       | 0-25.10                  | 8                       |
| <i>Chryseobacterium</i>               | 0.90                       | 0-17.11                  | 6                       |
| <i>Janthinobacterium</i>              | 0.54                       | 0-4.39                   | 6                       |
| <i>Lactococcus</i>                    | 0.52                       | 0-7.70                   | 3                       |
| <i>Planococcus</i>                    | 0.43                       | 0-18.25                  | 2                       |
| unclassified Carnobacteriaceae        | 0.40                       | 0-14.86                  | 4                       |
| <i>Herbaspirillum</i>                 | 0.36                       | 0-5.07                   | 6                       |
| unclassified Enterobacteriaceae       | 0.35                       | 0-7.22                   | 8                       |
| <i>Staphylococcus</i>                 | 0.29                       | 0-13.95                  | 4                       |
| <i>Burkholderia</i>                   | 0.27                       | 0-2.63                   | 5                       |
| unclassified Rhizobiales              | 0.27                       | 0-1.53                   | 12                      |
| <i>Sphingobacterium</i>               | 0.22                       | 0-3.68                   | 7                       |
| Microbacteriaceae                     | 0.22                       | 0-2.25                   | 10                      |
| uncultured Phyllobacteriaceae         | 0.19                       | 0-4.60                   | 1                       |
| unclassified Flavobacteriaceae        | 0.16                       | 0-1.42                   | 9                       |
| unclassified Burkholderiales          | 0.12                       | 0-1.35                   | 9                       |
| <i>Buttiauxella</i>                   | 0.09                       | 0-2.15                   | 3                       |
| <i>Brevundimonas</i>                  | 0.08                       | 0-1.20                   | 7                       |
| <i>Rhodanobacter</i>                  | 0.07                       | 0-1.18                   | 3                       |
| <i>Carnobacterium</i>                 | 0.07                       | 0-3.00                   | 2                       |
| unclassified Planococcaceae           | 0.06                       | 0-1.60                   | 2                       |
| <i>Leuconostoc</i>                    | 0.05                       | 0-1.32                   | 2                       |
| <i>Chitinophaga</i>                   | 0.05                       | 0-1.07                   | 1                       |
| unclassified Kurthia                  | 0.04                       | 0-1.96                   | 1                       |

Table 3S. Mean percentages and range of bacterial phyla and genera in portobello (n=16) and white button (n=12) mushroom samples as determined from pyrosequencing of 16S rRNA genes.

| Taxon                                 | Portobello |             | White button |             |
|---------------------------------------|------------|-------------|--------------|-------------|
|                                       | %          | Range       | %            | Range       |
| Proteobacteria                        | 97.12      | 81.63-100   | 97.26        | 77.64 -99.9 |
| <i>Pseudomonas</i>                    | 95.88      | 74.78-99.94 | 95.90        | 70.56-99.86 |
| unclassified Gammaproteobacteria      | 0.332      | 0-2.08      | 0.284        | 0.016-0.547 |
| <i>Serratia</i>                       | 0.228      | 0-1.71      | 0.017        | 0-0.234     |
| unclassified Oxalobacteraceae         | 0.122      | 0-3.15      | 0.021        | 0-0.127     |
| <i>Duganella</i>                      | 0.036      | 0-0.464     | 0.011        | 0-0.079     |
| <i>Herbaspirillum</i>                 | 0.027      | 0-0.695     | 0.002        | 0-0.033     |
| unclassified Enteric Bacteria cluster | 0.003      | 0-0.027     | 0.038        | 0-0.549     |
| <i>Janthinobacterium</i>              | 0.142      | 0-1.80      | 0.00         | 0           |
| unclassified Enterobacteriaceae       | 0.012      | 0-0.065     | 0.00         | 0           |
| unclassified Rhizobiales              | 0.027      | 0-0.384     | 0.083        | 0-0.434     |
| unclassified Burkholderiales          | 0.002      | 0-0.020     | 0.028        | 0-0.218     |
| <i>Dechloromonas</i>                  | 0.00       | 0           | 0.061        | 0-1.20      |
| Bacteroidetes                         | 2.71       | 0-17.94     | 0.87         | 0.036-3.83  |
| <i>Flavobacterium</i>                 | 1.44       | 0-11.68     | 0.072        | 0-0.663     |
| <i>Pedobacter</i>                     | 0.476      | 0-5.66      | 0.653        | 0-2.89      |
| <i>Sphingobacterium</i>               | 0.509      | 0-6.78      | 0.038        | 0-0.523     |
| <i>Chryseobacterium</i>               | 0.108      | 0-1.27      | 0.004        | 0-0.033     |
| <i>Mucilaginibacter</i>               | 0.062      | 0-0.613     | 0.009        | 0-0.167     |
| unclassified Flavobacteriaceae        | 0.017      | 0-0.110     | 0.040        | 0-0.449     |
| Actinobacteria                        | 0.122      | 0-0.439     | 0.32         | 0-3.24      |
| unclassified Microbacteriaceae        | 0.026      | 0-0.439     | 0.019        | 0-0.121     |
| <i>Propionibacterium</i>              | 0.00       | 0           | 0.168        | 0-2.23      |
| <i>Corynebacterium</i>                | 0.00       | 0           | 0.087        | 0-1.05      |
| Firmicutes                            | 0.015      | 0-0.105     | 1.41         | 0-16.67     |
| <i>Staphylococcus</i>                 | 0.00       | 0           | 0.051        | 0-0.665     |
| unclassified Bacilli                  | 0.002      | 0-0.027     | 0.170        | 0-2.470     |
| unclassified Firmicutes               | 0.012      | 0-0.105     | 0.923        | 0-10.78     |
| <i>Streptococcus</i>                  | 0.00       | 0           | 0.159        | 0-2.38      |
| unclassified Bacteria                 | 0.041      | 0-0.265     | 0.14         | 0-2.35      |
